# Supplementary material
Source: Research Square preprint supplement (doi:10.21203/rs.3.rs-9116446/v1)
Supplement: Supplementary file 1 [file 477c0cd8706192a91a097d8d.docx]

PRISMA 2020 Checklist
Manuscript: Intradiscal Mesenchymal Stromal Cell Therapy for Lumbar Discogenic Low Back Pain Due to Degenerative Disc Disease: A Systematic Review

| **Section / Topic** | **PRISMA Item** | **Reported in Manuscript Section** |
| --- | --- | --- |
| Title | Identify the report as a systematic review. | Title Page |
| Abstract | Provide a structured summary including background, objectives, methods, results, and conclusions. | Abstract |
| Introduction – Rationale | Describe the rationale for the review in the context of existing knowledge. | Introduction |
| Introduction – Objectives | Provide an explicit statement of the objective(s) or question(s). | Introduction |
| Methods – Reporting standards | Specify adherence to PRISMA guidelines. | Methods – Reporting Standards |
| Methods – Eligibility criteria | Specify study characteristics and eligibility criteria. | Methods – Eligibility Criteria |
| Methods – Information sources | Specify all databases and sources searched. | Methods – Search Strategy |
| Methods – Search strategy | Describe search terms and strategy used to identify studies. | Methods – Search Strategy |
| Methods – Selection process | Specify the process used for screening and selecting studies. | Methods – Study Selection |
| Methods – Data collection process | Describe the process used for data extraction. | Methods – Data Extraction |
| Methods – Data items | List and define variables extracted from included studies. | Methods – Data Extraction |
| Methods – Risk of bias assessment | Specify the methods used to assess risk of bias in included studies. | Methods – Risk of Bias Assessment |
| Methods – Synthesis methods | Describe how results were summarized and synthesized. | Methods and Results Sections |
| Results – Study selection | Describe the results of the search and screening process. | Results – Study Selection |
| Results – Study characteristics | Present characteristics of included studies. | Results – Study Characteristics |
| Results – Results of individual studies | Present findings of the included studies. | Tables 1–3 and Results Sections |
| Results – Risk of bias | Present findings of risk of bias assessment. | Results – Risk of Bias |
| Results – Synthesis of results | Summarize the main findings across studies. | Results – Pain Outcomes, Functional Outcomes, Imaging Outcomes |
| Discussion – Interpretation | Provide interpretation of the results in the context of existing knowledge. | Discussion |
| Discussion – Limitations | Discuss limitations of included studies and the review process. | Limitations |
| Other – Ethics approval | State ethics considerations if applicable. | Declarations – Ethics Approval |
| Other – Data availability | Provide information about data availability. | Declarations – Data Availability |
| Other – Conflicts of interest | Declare competing interests. | Declarations – Conflict of Interest |
| Other – Funding | Describe funding sources. | Declarations – Funding |
